# Supplementary material
Source: publisher site journal article supplement (https://www.spandidos-publications.com/4615/downloadSupplementary)

Figure S1. Transfection efficiency of miR-145-5p mimic, inhibitor, TUG1 wt, TUG1 mut, si-SOX2, SOX2 wt and SOX2 mut in M14 and A375 cells. The expression of miR-145-5p in M14 and A375 cells transfected with (A) miR-145-5p mimic or (B) inhibitor. \*P<0.05 vs. miR-NC group or in-miR-NC. (C) TUG1 expression in M14 and A375 cells transfected with pcDNA, TUG1 wt or TUG1 mut. \*P<0.05 vs. pcDNA. (D) RT-qPCR assay for SOX2 expression in M14 and A375 cells transfected si-NC or si-SOX2. \*P<0.05 vs. si-NC. (E) SOX2 expression in M14 and A375 cells transfected with pcDNA, SOX2 wt or SOX2 mut. \*P<0.05 vs. pcDNA. miR, microRNA; in-miR, miR inhibitor; RT-qPCR, reverse transcription-quantitative PCR; wt, wild type; mut, mutant type; TUG1, taurine-upregulated gene 1; SOX2, SRY (sex determining region Y)-box 2.

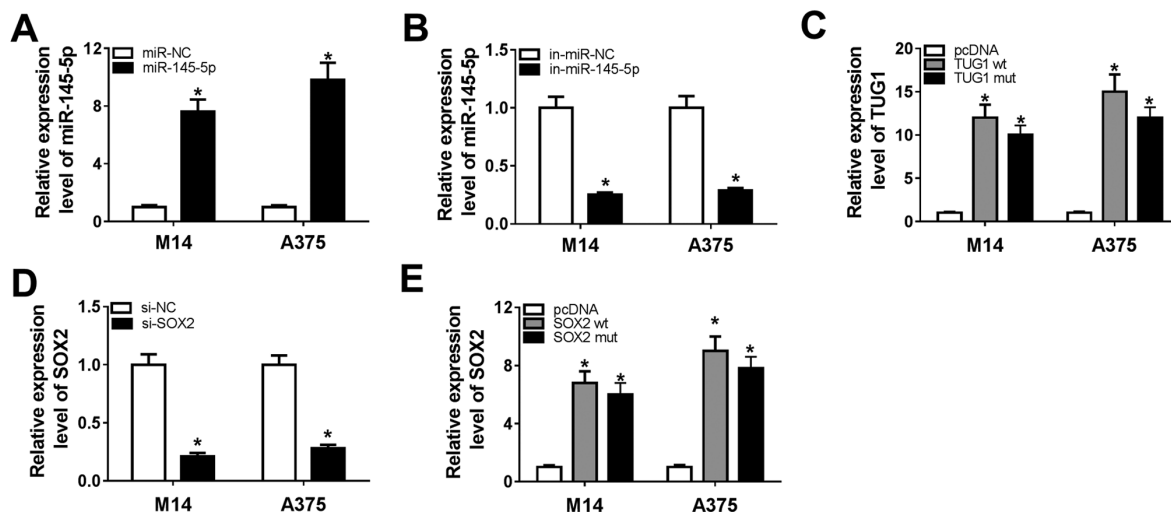

Supplement: Supplementary file 1 [file downloadSupplementary]
